# Supplementary material for: Distinct Immune Profiles of Exhausted Effector and Memory CD8+ T Cells in Individuals With Filarial Lymphedema
Source: Front Cell Infect Microbiol. 2021 Aug 11;11:680832. doi: 10.3389/fcimb.2021.680832 (PMC8415778; doi:10.3389/fcimb.2021.680832)
Supplement: Supplementary file 2 [file Table_1.xlsx]

## Sheet: Sheet1
Dreyer lymphedema stage	1	2	3	4	5	6	7
Sample size (n)	0	10	6	0	0	7	0
Mean age [range]	NA	43.9 [26-75]	46.3 [26-64]	NA	NA	46.9 [26-64]	NA
Gender (Female:Male) [%]	NA	6:4 [60:40]	6:00 [100:0]	NA	NA	7:00 [100:0]	NA
Mean years living in the endemic area [range]	NA	40.4 [23-75]	46.3 [26-64]	NA	NA	46.9 [26-64]	NA
Median MDA rounds [range]	NA	4.5 [2-10]	5 [4-10]	NA	NA	6 [4-15]	NA
Sppl Table 1: LE cohort population characteristics.
Study participants with leg lymphedema were classified according to the Dreyer staging protocol (Dreyer 2003). Supplementary table 1 shows total sample size, age, gender, years living in the endemic area, as well as mean rounds of MDA received for each of these stages.
